# Supplementary material
Source: publisher figshare collection journal article supplement (https://acs.figshare.com/ndownloader/files/16510103)
Supplement: Supplementary file 1 [file 16510103]

## Supporting information

### Quasi-Single-Layer MoS<sub>2</sub> on MoS<sub>2</sub>/TiO<sub>2</sub> Nanoparticles for Anthracene Hydrogenation

*Donge Wang,<sup>a</sup> Jiahe Li,<sup>a</sup> Anda Zheng,<sup>a</sup> Huaijun Ma,<sup>a</sup> Zhendong Pan,<sup>a</sup> Wei Qu,<sup>a</sup> Lin Wang,<sup>a</sup> Jianqiang Han,<sup>a</sup> Congxin Wang,<sup>a</sup> Zhijian Tian<sup>a,b\*</sup>*

<sup>a</sup> Dalian National Laboratory for Clean Energy, Dalian Institute of Chemical Physics, Chinese Academy of Sciences, Dalian, 116023, China

<sup>b</sup> State Key Laboratory of Catalysis, Dalian Institute of Chemical Physics, Chinese Academy of Sciences, Dalian, 116023, China

**Figure captions:**

Figure S1 Phase compositions of supported MoS<sub>2</sub>/TiO<sub>2</sub> nanocatalysts with different MoS<sub>2</sub> loadings synthesized by hydrothermal method.

Figure S2 SEM images of (a) HT-P25-400, and (b) HT-ATM-30.

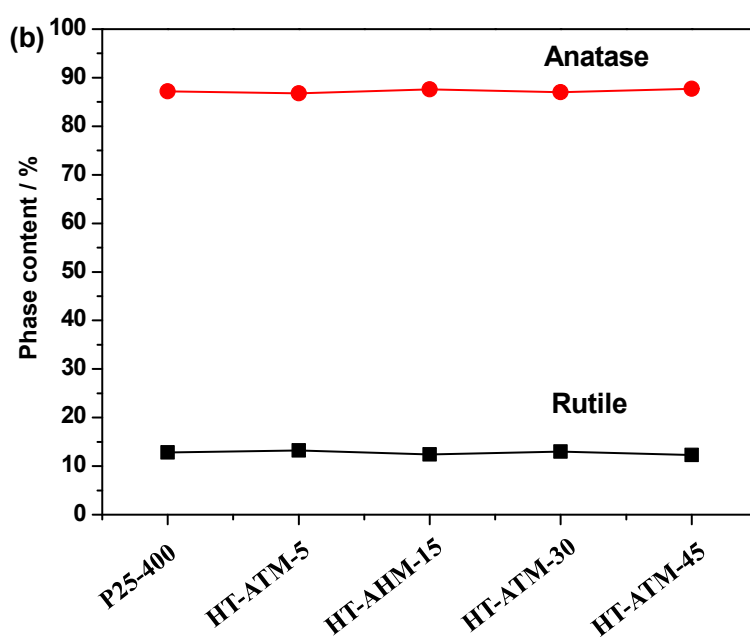

Figure S1 Phase compositions of supported MoS<sub>2</sub>/TiO<sub>2</sub> nanocatalysts with different MoS<sub>2</sub> loadings synthesized by hydrothermal method.

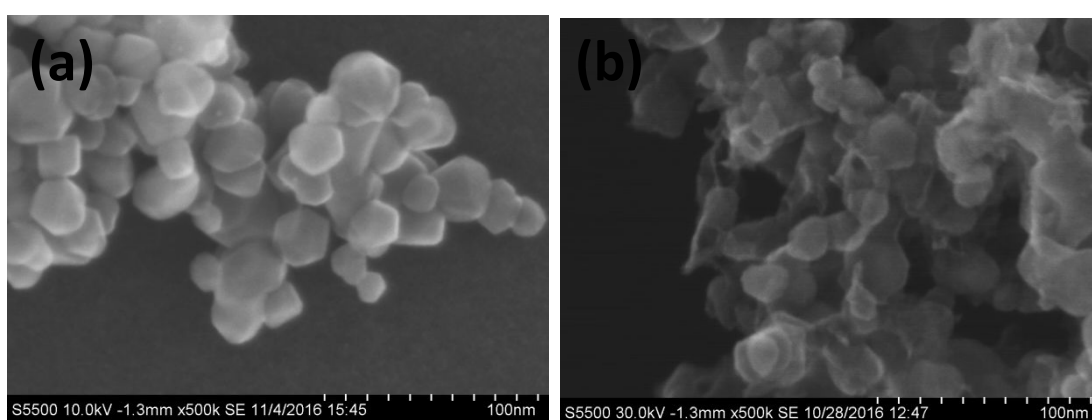

Figure S2 SEM images of (a) HT-P25-400, and (b) HT-ATM-30.
